# Supplementary material for: Clustering of substance use and sexual risk behaviour in adolescence: analysis of two cohort studies
Source: HighWire-hosted journal article supplement (doi:10.1136/bmjopen-2011-000661), 2012-01-01
Supplement: bmjopen-2011-000661-s1.pdf [file bmjopen-2011-000661-s1.pdf]

Title: Clustering of substance use and sexual risk behaviour in adolescence: analysis of two cohort studies

STROBE Statement—Checklist of items that should be included in reports of *cohort studies*

|                              | <b>Item No</b> | <b>Recommendation</b>                                                                                                                                                                | <b>Reported on page No.</b>                                      |
|------------------------------|----------------|--------------------------------------------------------------------------------------------------------------------------------------------------------------------------------------|------------------------------------------------------------------|
| <b>Title and abstract</b>    | 1              | (a) Indicate the study's design with a commonly used term in the title or the abstract                                                                                               | Title (cohort studies)                                           |
|                              |                | (b) Provide in the abstract an informative and balanced summary of what was done and what was found                                                                                  | p1                                                               |
| <b>Introduction</b>          |                |                                                                                                                                                                                      |                                                                  |
| Background/rationale         | 2              | Explain the scientific background and rationale for the investigation being reported                                                                                                 | p2-3                                                             |
| Objectives                   | 3              | State specific objectives, including any prespecified hypotheses                                                                                                                     | p3                                                               |
| <b>Methods</b>               |                |                                                                                                                                                                                      |                                                                  |
| Study design                 | 4              | Present key elements of study design early in the paper                                                                                                                              | p3-4                                                             |
| Setting                      | 5              | Describe the setting, locations, and relevant dates, including periods of recruitment, exposure, follow-up, and data collection                                                      | p3-4                                                             |
| Participants                 | 6              | (a) Give the eligibility criteria, and the sources and methods of selection of participants. Describe methods of follow-up                                                           | p3-4                                                             |
|                              |                | (b) For matched studies, give matching criteria and number of exposed and unexposed                                                                                                  | NA                                                               |
| Variables                    | 7              | Clearly define all outcomes, exposures, predictors, potential confounders, and effect modifiers. Give diagnostic criteria, if applicable                                             | p4-5                                                             |
| Data sources/<br>measurement | 8*             | For each variable of interest, give sources of data and details of methods of assessment (measurement). Describe comparability of assessment methods if there is more than one group | p3-4                                                             |
| Bias                         | 9              | Describe any efforts to address potential sources of bias                                                                                                                            | p5 (calculated attrition-based weights to account for attrition) |
| Study size                   | 10             | Explain how the study size was arrived at                                                                                                                                            | Not reported*                                                    |
| Quantitative variables       | 11             | Explain how quantitative variables were handled in the analyses. If applicable, describe which groupings were chosen and why                                                         | p4-5                                                             |
| Statistical methods          | 12             | (a) Describe all statistical methods, including those used to control for confounding                                                                                                | p5-6                                                             |
|                              |                | (b) Describe any methods used to examine subgroups and interactions                                                                                                                  | p5-6                                                             |
|                              |                | (c) Explain how missing data were addressed                                                                                                                                          | p5                                                               |
|                              |                | (d) If applicable, explain how loss to follow-up was addressed                                                                                                                       | P5                                                               |
|                              |                | (e) Describe any sensitivity analyses                                                                                                                                                | None                                                             |

**Results**

|                          |     |                                                                                                                                                                                                              |                                                                                                                                      |
|--------------------------|-----|--------------------------------------------------------------------------------------------------------------------------------------------------------------------------------------------------------------|--------------------------------------------------------------------------------------------------------------------------------------|
| Participants             | 13* | (a) Report numbers of individuals at each stage of study—eg numbers potentially eligible, examined for eligibility, confirmed eligible, included in the study, completing follow-up, and analysed            | Reported in Methods (p3-4 and in Table 1 of results)                                                                                 |
|                          |     | (b) Give reasons for non-participation at each stage                                                                                                                                                         | Reported in methods p3-4                                                                                                             |
|                          |     | (c) Consider use of a flow diagram                                                                                                                                                                           | Not used                                                                                                                             |
| Descriptive data         | 14* | (a) Give characteristics of study participants (eg demographic, clinical, social) and information on exposures and potential confounders                                                                     | Reported in table 1                                                                                                                  |
|                          |     | (b) Indicate number of participants with missing data for each variable of interest                                                                                                                          | Indicated in methods (p3-4) and can be deduced from table 1                                                                          |
|                          |     | (c) Summarise follow-up time (eg, average and total amount)                                                                                                                                                  | Described in methods                                                                                                                 |
| Outcome data             | 15* | Report numbers of outcome events or summary measures over time                                                                                                                                               | Given in tables and in first paragraph of results (p6)                                                                               |
| Main results             | 16  | (a) Give unadjusted estimates and, if applicable, confounder-adjusted estimates and their precision (eg, 95% confidence interval). Make clear which confounders were adjusted for and why they were included | Unadjusted estimates reported in tables 2 and 3 and in text (p7-8). Adjusted findings reported in figures 1 and 2 and in text (p7-8) |
|                          |     | (b) Report category boundaries when continuous variables were categorized                                                                                                                                    | NA                                                                                                                                   |
|                          |     | (c) If relevant, consider translating estimates of relative risk into absolute risk for a meaningful time period                                                                                             | NA                                                                                                                                   |
| Other analyses           | 17  | Report other analyses done—eg analyses of subgroups and interactions, and sensitivity analyses                                                                                                               | Reported in p7-8                                                                                                                     |
| <b>Discussion</b>        |     |                                                                                                                                                                                                              |                                                                                                                                      |
| Key results              | 18  | Summarise key results with reference to study objectives                                                                                                                                                     | p8                                                                                                                                   |
| Limitations              | 19  | Discuss limitations of the study, taking into account sources of potential bias or imprecision. Discuss both direction and magnitude of any potential bias                                                   | p9                                                                                                                                   |
| Interpretation           | 20  | Give a cautious overall interpretation of results considering objectives, limitations, multiplicity of analyses, results from similar studies, and other relevant evidence                                   | P8-9                                                                                                                                 |
| Generalisability         | 21  | Discuss the generalisability (external validity) of the study results                                                                                                                                        | Considered amongst the limitations (p9)                                                                                              |
| <b>Other information</b> |     |                                                                                                                                                                                                              |                                                                                                                                      |
| Funding                  | 22  | Give the source of funding and the role of the funders for the present study and, if applicable, for the original study on which the present article is based                                                | p12                                                                                                                                  |

\*Given that this is a secondary analysis of existing cohorts, we did not carry out any sample size calculations for this particular analysis. However, these calculations were done when the cohorts were set up. We did not think it was appropriate to include these in this particular report.
