# Supplementary material for: Clustering of substance use and sexual risk behaviour in adolescence: analysis of two cohort studies
Source: HighWire-hosted journal article supplement (doi:10.1136/bmjopen-2011-000661), 2012-01-01
Supplement: bmjopen-2011-000661-s4.pdf [file bmjopen-2011-000661-s4.pdf]

**Web Table 2 Rates of multiple (3+) sexual partners in late adolescence according to substance use and associated odds ratios (unadjusted for other substance use) for each cohort, by social class**

|                                | 1987/1990 ('earlier') cohort |      |                    |      |                  | 1999/2003 ('later') cohort |      |                    |      |                  | <i>p-value of interaction with cohort</i> |
|--------------------------------|------------------------------|------|--------------------|------|------------------|----------------------------|------|--------------------|------|------------------|-------------------------------------------|
|                                | <3 sexual partners           |      | 3+ sexual partners |      | OR (95% CI)*     | <3 sexual partners         |      | 3+ sexual partners |      | OR (95% CI)*     |                                           |
|                                | N                            | %    | N                  | %    |                  | N                          | %    | N                  | %    |                  |                                           |
| <b>NON-MANUAL</b>              |                              |      |                    |      |                  |                            |      |                    |      |                  |                                           |
| <b>Current smoking</b>         |                              |      |                    |      |                  |                            |      |                    |      |                  |                                           |
| No                             | 229                          | 74.6 | 35                 | 48.6 | 1.00             | 199                        | 84.0 | 105                | 60.3 | 1.00             | 0.813                                     |
| Yes                            | 78                           | 25.4 | 37                 | 51.4 | 3.18 (1.80-5.63) | 38                         | 16.0 | 69                 | 39.7 | 3.34 (2.10-5.31) |                                           |
| <b>Excessive drinking†</b>     |                              |      |                    |      |                  |                            |      |                    |      |                  |                                           |
| No                             | 252                          | 82.4 | 37                 | 51.4 | 1.00             | 186                        | 78.5 | 91                 | 52.3 | 1.00             | 0.472                                     |
| Yes                            | 54                           | 17.6 | 35                 | 48.6 | 3.93 (2.16-7.12) | 51                         | 21.5 | 83                 | 47.7 | 3.30 (2.13-5.11) |                                           |
| <b>Ever used illicit drugs</b> |                              |      |                    |      |                  |                            |      |                    |      |                  |                                           |
| No                             | 230                          | 75.2 | 26                 | 36.6 | 1.00             | 139                        | 58.6 | 47                 | 27.0 | 1.00             | 0.405                                     |
| Yes                            | 76                           | 24.8 | 45                 | 63.4 | 4.60 (2.59-8.19) | 98                         | 41.4 | 127                | 73.0 | 3.84 (2.49-5.93) |                                           |
| <b>MANUAL</b>                  |                              |      |                    |      |                  |                            |      |                    |      |                  |                                           |
| <b>Current smoking</b>         |                              |      |                    |      |                  |                            |      |                    |      |                  |                                           |
| No                             | 255                          | 69.1 | 70                 | 50.0 | 1.00             | 165                        | 75.0 | 133                | 47.7 | 1.00             | 0.191                                     |
| Yes                            | 114                          | 30.9 | 70                 | 50.0 | 3.13 (1.94-5.05) | 55                         | 25.0 | 146                | 52.3 | 3.37 (2.28-5.00) |                                           |
| <b>Excessive drinking†</b>     |                              |      |                    |      |                  |                            |      |                    |      |                  |                                           |
| No                             | 337                          | 91.3 | 81                 | 57.9 | 1.00             | 181                        | 82.3 | 158                | 56.6 | 1.00             | 0.247                                     |
| Yes                            | 32                           | 8.7  | 59                 | 42.1 | 5.08 (2.93-8.79) | 39                         | 17.7 | 121                | 43.4 | 3.66 (2.38-5.63) |                                           |
| <b>Ever used illicit drugs</b> |                              |      |                    |      |                  |                            |      |                    |      |                  |                                           |
| No                             | 287                          | 78.0 | 55                 | 39.3 | 1.00             | 128                        | 58.2 | 63                 | 22.6 | 1.00             | 0.727                                     |
| Yes                            | 81                           | 22.0 | 85                 | 60.7 | 3.99 (2.50-6.35) | 92                         | 41.8 | 216                | 77.4 | 4.73 (3.18-7.04) |                                           |

p-values of interactions by social class: within 1987/1990 cohort - current smoking by class p=0.674, excessive drinking by class p=0.349, ever illicit drugs by class p=0.749; within 1999/2003 cohort – current smoking by class p=0.983, excessive drinking by class p=0.672, ever illicit drugs by class p=0.379.

\*Adjusted for age and gender.

†Defined as ≥ 22 units in the past week for males, ≥ 15 units for females.
