# Supplementary material for: Clustering of substance use and sexual risk behaviour in adolescence: analysis of two cohort studies
Source: HighWire-hosted journal article supplement (doi:10.1136/bmjopen-2011-000661), 2012-01-01
Supplement: bmjopen-2011-000661-s5.pdf [file bmjopen-2011-000661-s5.pdf]

**Web Table 3 Rates of early sexual initiation according to early adolescent substance use and associated odds ratios (unadjusted for other substance use) for each cohort, by social class**

|                                       | 1987/1990 ('earlier') cohort |      |                         |      |                  | 1999/2003 ('later') cohort |      |                         |      |                   | <i>p-value of interaction with cohort</i> |
|---------------------------------------|------------------------------|------|-------------------------|------|------------------|----------------------------|------|-------------------------|------|-------------------|-------------------------------------------|
|                                       | No early sexual initiation   |      | Early sexual initiation |      | OR (95% CI)*     | No early sexual initiation |      | Early sexual initiation |      | OR (95% CI)*      |                                           |
|                                       | N                            | %    | N                       | %    |                  | N                          | %    | N                       | %    |                   |                                           |
| <b>NON-MANUAL</b>                     |                              |      |                         |      |                  |                            |      |                         |      |                   |                                           |
| <b>Started smoking age &lt;14</b>     |                              |      |                         |      |                  |                            |      |                         |      |                   |                                           |
| No                                    | 272                          | 82.2 | 31                      | 68.9 | 1.00             | 295                        | 92.5 | 58                      | 65.2 | 1.00              | 0.010                                     |
| Yes                                   | 59                           | 17.8 | 14                      | 31.1 | 1.96 (0.96-3.98) | 24                         | 7.5  | 31                      | 34.8 | 6.58 (3.61-12.01) |                                           |
| <b>Monthly drinking age 15</b>        |                              |      |                         |      |                  |                            |      |                         |      |                   |                                           |
| No                                    | 262                          | 79.2 | 28                      | 63.6 | 1.00             | 145                        | 45.5 | 13                      | 14.6 | 1.00              | 0.080                                     |
| Yes                                   | 69                           | 20.8 | 16                      | 36.4 | 2.13 (1.09-4.18) | 174                        | 54.5 | 76                      | 85.4 | 4.83 (2.58-9.02)  |                                           |
| <b>Ever used illicit drugs age 15</b> |                              |      |                         |      |                  |                            |      |                         |      |                   |                                           |
| No                                    | 313                          | 94.8 | 36                      | 80.0 | 1.00             | 234                        | 73.1 | 26                      | 29.2 | 1.00              | 0.429                                     |
| Yes                                   | 17                           | 5.2  | 9                       | 20.0 | 3.92 (1.59-9.67) | 86                         | 26.9 | 63                      | 70.8 | 6.87 (4.06-11.63) |                                           |
| <b>MANUAL</b>                         |                              |      |                         |      |                  |                            |      |                         |      |                   |                                           |
| <b>Started smoking age &lt;14</b>     |                              |      |                         |      |                  |                            |      |                         |      |                   |                                           |
| No                                    | 333                          | 80.2 | 55                      | 58.5 | 1.00             | 288                        | 82.5 | 97                      | 55.1 | 1.00              | 0.277                                     |
| Yes                                   | 82                           | 19.8 | 39                      | 41.5 | 3.29 (1.96-5.50) | 61                         | 17.5 | 79                      | 44.9 | 4.01 (2.66-6.05)  |                                           |
| <b>Monthly drinking age 15</b>        |                              |      |                         |      |                  |                            |      |                         |      |                   |                                           |
| No                                    | 360                          | 86.7 | 59                      | 62.8 | 1.00             | 141                        | 40.4 | 34                      | 19.3 | 1.00              | 0.723                                     |
| Yes                                   | 55                           | 13.3 | 35                      | 37.2 | 3.32 (1.95-5.64) | 208                        | 59.6 | 142                     | 80.7 | 2.92 (1.89-4.51)  |                                           |
| <b>Ever used illicit drugs age 15</b> |                              |      |                         |      |                  |                            |      |                         |      |                   |                                           |
| No                                    | 382                          | 92.0 | 69                      | 73.4 | 1.00             | 214                        | 61.5 | 68                      | 38.6 | 1.00              | 0.369                                     |
| Yes                                   | 33                           | 8.0  | 25                      | 26.6 | 3.73 (2.01-6.89) | 134                        | 38.5 | 108                     | 61.4 | 2.62 (1.80-3.82)  |                                           |

p-values of interactions by social class: within 1987/1990 cohort – started smoking age <14 by class p=0.284, monthly drinking age 15 by class p=0.301, ever illicit drugs age 15 by class p=0.949; within 1999/2003 cohort – started smoking age <14 by class p=0.149, monthly drinking age 15 by class p=0.159, ever illicit drugs age 15 by class p=0.005.

\*Adjusted for gender.
